# Supplementary material
Source: PubMed Central journal article supplement (PMC10991389)
Supplement: 262_2022_3308_MOESM1_ESM.pdf [file 262_2022_3308_MOESM1_ESM.pdf]

## Supplementary Figure

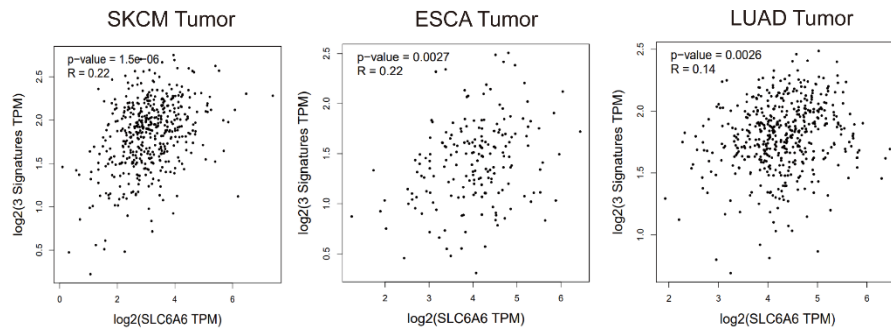

**Supplementary Fig. 1. The correlation between SLC6A6 and effector T cell signature is investigated in SKCM (left), ESCA (middle) and LUAD (right) tumors using GEPIA.**

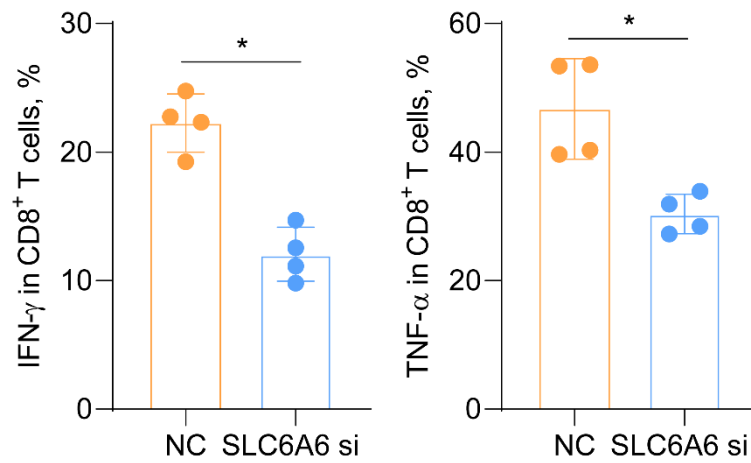

**Supplementary Fig. 2. The antitumor function of CD8<sup>+</sup> T cells is declined after SLC6A6 knockdown.** The cytotoxic cytokines IFN- $\gamma$  (Left) and TNF- $\alpha$  (Right) were detected by flow cytometry in NC and SLC6A6 si CD8<sup>+</sup> T cells. The data are presented as means  $\pm$  SEM. Student's *t*-test was used for comparisons between two groups. \* $P$ <0.05.

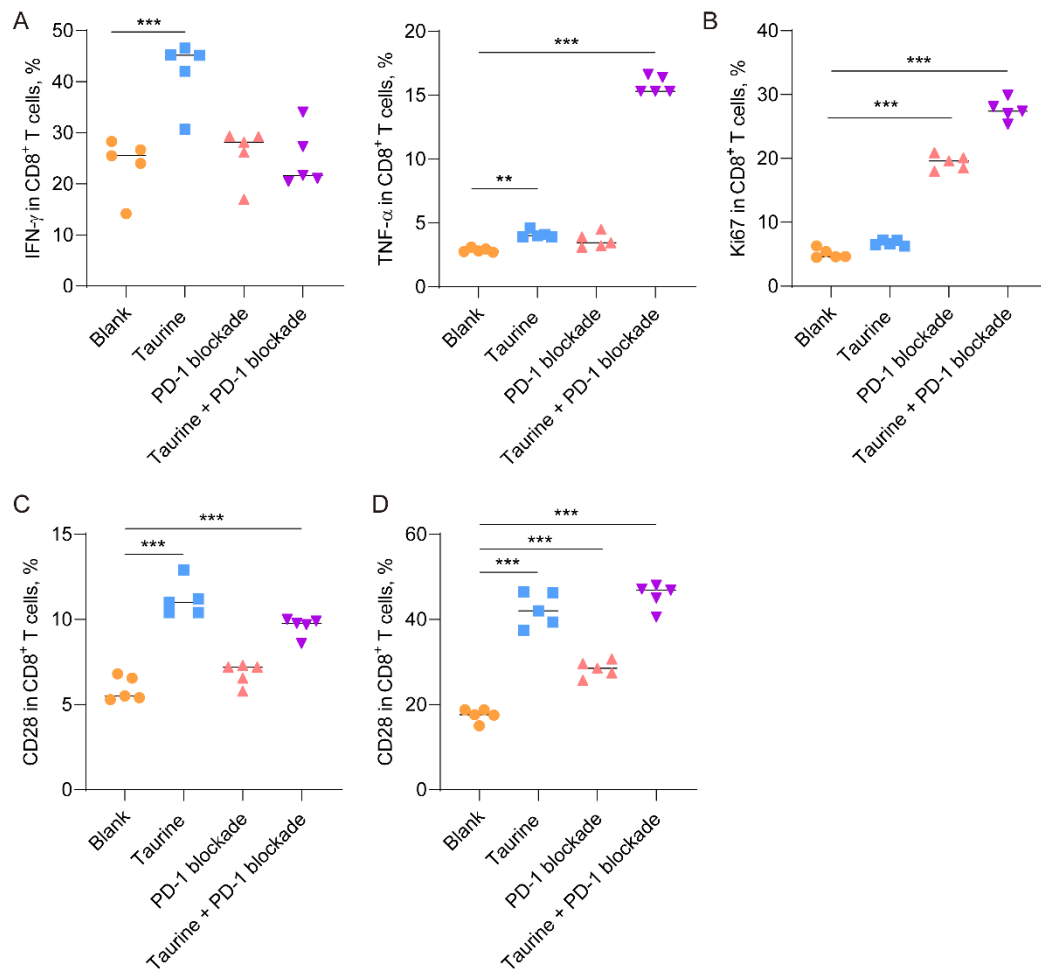

**Supplementary Fig. 3. The antitumor function of CD8<sup>+</sup> T cells is enhanced by taurine plus PD-1 blockade therapy.** B16 tumor cells were injected into the right flanks of C57BL/6 mice treated with PBS, taurine, PD-1 blockade, or taurine plus PD-1 blockade. (A-C) Cytotoxic cytokine secretion (A), proliferation (B) and activation (C) of CD8<sup>+</sup> T cells in spleen were assayed in the four groups at 17 days. (D) CD28 expression in intratumoral CD8<sup>+</sup> T cell was detected in the four groups at 17 days. The data are presented as means  $\pm$  SEM. Student's *t*-test was used for comparisons between two groups. \*\* $P < 0.01$ , \*\*\* $P < 0.001$ .

**Supplementary Table 1. Clinical information of LUAD patients in this study**

| <b>Number</b> | <b>Gender</b> | <b>Age</b> | <b>Differentiation</b> | <b>Surgery</b> | <b>TNM</b> | <b>Clinical outcome</b> |
|---------------|---------------|------------|------------------------|----------------|------------|-------------------------|
| P1            | woman         | 67         | unknown                | no             | T4N3M1a    | NR                      |
| P2            | man           | 71         | meddle-low             | yes            | T3N2M0     | NR                      |
| P3            | man           | 56         | unknown                | no             | TxN2M1     | NR                      |
| P4            | man           | 48         | unknown                | no             | T4N2M0     | NR                      |
| P5            | woman         | 56         | unknown                | no             | T2N3M1     | NR                      |
| P6            | man           | 54         | unknown                | yes            | T3N0M0     | NR                      |
| P7            | woman         | 65         | unknown                | no             | TxN3M0     | R                       |
| P8            | woman         | 52         | unknown                | no             | T4N3M1c    | R                       |
| P9            | woman         | 50         | unknown                | no             | TxN3M1     | R                       |
| P10           | man           | 58         | low                    | no             | T1N2M0     | R                       |
| P11           | man           | 59         | low                    | no             | TxN3M1c    | R                       |
| P12           | woman         | 57         | low                    | no             | T3N2M0     | R                       |
| P13           | man           | 58         | unknown                | no             | T3N0M0     | R                       |
| P14           | man           | 67         | low                    | yes            | T1N2M0     | R                       |
| P15           | woman         | 75         | low                    | no             | T2N3M1     | R                       |
| P16           | man           | 55         | unknown                | no             | T4N3M1c    | R                       |
| P17           | man           | 47         | unknown                | no             | TxNxM1     | R                       |
| P18           | man           | 45         | low                    | yes            | T0N3M1     | R                       |
| P19           | man           | 57         | low                    | no             | T3N0M0     | R                       |
| P20           | man           | 56         | middle                 | yes            | TxN3M0     | R                       |
| P21           | man           | 62         | low                    | yes            | TxN2M0     | R                       |

**Supplementary Table 2. Correlation analysis of metabolic pathway and CD8<sup>+</sup> T cells in LUAD patients using TCGA**

| <b>Metabolic pathway</b>                        | <b>Correlation</b> | <b>p value</b> |
|-------------------------------------------------|--------------------|----------------|
| HALLMARK_XENOBIOTIC_METABOLISM                  | 0.476              | 4.78E-31       |
| HALLMARK_FATTY_ACID_METABOLISM                  | 0.321              | 4.48E-14       |
| HALLMARK_HEME_METABOLISM                        | 0.501              | 9.03E-35       |
| HALLMARK_BILE_ACID_METABOLISM                   | 0.425              | 1.67E-24       |
| KEGG_GLYCEROLIPID_METABOLISM                    | 0.386              | 4.05E-20       |
| KEGG_GLYCEROPHOSPHOLIPID_METABOLISM             | 0.437              | 5.33E-26       |
| KEGG_ETHER_LIPID_METABOLISM                     | 0.451              | 8.89E-28       |
| KEGG_ARACHIDONIC_ACID_METABOLISM                | 0.373              | 7.53E-19       |
| KEGG_LINOLEIC_ACID_METABOLISM                   | 0.27               | 3.15E-10       |
| KEGG_ALPHA_LINOLENIC_ACID_METABOLISM            | 0.338              | 1.64E-15       |
| KEGG_SPHINGOLIPID_METABOLISM                    | 0.421              | 5.15E-24       |
| KEGG_RIBOFLAVIN_METABOLISM                      | 0.063              | 0.145921       |
| KEGG_NICOTINATE_AND_NICOTINAMIDE_METABOLISM     | 0.339              | 1.31E-15       |
| KEGG_FRUCTOSE_AND_MANNOSE_METABOLISM            | 0.314              | 1.85E-13       |
| KEGG_GALACTOSE_METABOLISM                       | 0.46               | 6.67E-29       |
| KEGG_ASCORBATE_AND_ALDARATE_METABOLISM          | -0.041             | 0.348668       |
| KEGG_FATTY_ACID_METABOLISM                      | 0.199              | 4.09E-06       |
| KEGG_PURINE_METABOLISM                          | 0.388              | 2.47E-20       |
| KEGG_PYRIMIDINE_METABOLISM                      | 0.322              | 3.44E-14       |
| KEGG_ALANINE_ASPARTATE_AND_GLUTAMATE_METABOLISM | 0.378              | 2.42E-19       |
| KEGG_GLYCINE_SERINE_AND_THREONINE_METABOLISM    | 0.312              | 2.61E-13       |
| KEGG_CYSTEINE_AND_METHIONINE_METABOLISM         | 0.307              | 6.29E-13       |
| KEGG_ARGININE_AND_PROLINE_METABOLISM            | 0.291              | 1.03E-11       |
| KEGG_HISTIDINE_METABOLISM                       | 0.263              | 9.65E-10       |
| KEGG_TYROSINE_METABOLISM                        | 0.303              | 1.16E-12       |
| KEGG_PHENYLALANINE_METABOLISM                   | 0.312              | 2.33E-13       |
| KEGG_TRYPTOPHAN_METABOLISM                      | 0.501              | 9.43E-35       |
| KEGG_BETA_ALANINE_METABOLISM                    | 0.367              | 3.62E-18       |
| KEGG_TAURINE_AND_HYPOTAURINE_METABOLISM         | 0.292              | 8.56E-12       |
| KEGG_SELENOAMINO_ACID_METABOLISM                | 0.259              | 1.58E-09       |
| KEGG_GLUTATHIONE_METABOLISM                     | 0.253              | 3.95E-09       |

|                                                   |       |          |
|---------------------------------------------------|-------|----------|
| KEGG_STARCH_AND_SUCROSE_METABOLISM                | 0.053 | 0.22216  |
| KEGG_AMINO_SUGAR_AND_NUCLEOTIDE_SUGAR_METABOLISM  | 0.503 | 4.61E-35 |
| KEGG_INOSITOL_PHOSPHATE_METABOLISM                | 0.331 | 6.01E-15 |
| KEGG_PYRUVATE_METABOLISM                          | 0.167 | 0.000123 |
| KEGG_GLYOXYLATE_AND_DICARBOXYLATE_METABOLISM      | 0.25  | 6.52E-09 |
| KEGG_BUTANOATE_METABOLISM                         | 0.158 | 0.000269 |
| KEGG_RETINOL_METABOLISM                           | 0.078 | 0.072945 |
| KEGG_PORPHYRIN_AND_CHLOROPHYLL_METABOLISM         | 0.02  | 0.651121 |
| KEGG_NITROGEN_METABOLISM                          | 0.067 | 0.126791 |
| KEGG_SULFUR_METABOLISM                            | 0.309 | 4.14E-13 |
| KEGG_METABOLISM_OF_XENOBIOTICS_BY_CYTOCHROME_P450 | 0.085 | 0.05239  |
| KEGG_DRUG_METABOLISM_CYTOCHROME_P450              | 0.096 | 0.027082 |
| KEGG_DRUG_METABOLISM_OTHER_ENZYMES                | 0.076 | 0.08103  |

---
